# Supplementary material for: Antimicrobial Doses in Continuous Renal Replacement Therapy: A Comparison of Dosing Strategies
Source: Crit Care Res Pract. 2016 Jun 28;2016:3235765. doi: 10.1155/2016/3235765 (PMC4940534; doi:10.1155/2016/3235765)
Supplement: Supplementary file 1 — A list of the references used to generate the pharmacokinetic parameters responsible for the values in Table 2. [file 3235765.f1.docx]

| **Appendix.** Complete dataset of all medications. Shown are the total 75 medications with enough data to be used by at least one group member; seventy-one of the medications were able to be used for the Modified Kroh analysis in this study. Parameters include: DN (dose in person with normal renal function based on package insert), CLESRD (total body clearance in anuric person with ESRD), CLN (total body clearance in person with normal renal function), Aronoff et al. dose (dose given in Aronoff text), CLAKI (total body clearance in anuric person with AKI), SC (sieving coefficient), Danuria (recommended dose in anuric patients based on package insert), and CLNR (nonrenal drug clearance in an individual with normal renal function). Not displayed are the assumed constants: CLCRtot (33ml/min; sum of renal and extracorporeal creatinine clearance in an anuric patient undergoing CRRT), CLCRn (100ml/min; normal creatinine clearance for patient with normal renal function), and QF (33.3ml/min; ultrafiltration rate). Asterisk (*) denotes data was not found. | | | | | | | | | |
| --- | --- | --- | --- | --- | --- | --- | --- | --- | --- |
| **Drug Name** | **DN (mg/day)** | **CLESRD (mL/min)** | **CLN (mL/min)** | **Aronoff et al. Dose (mg/day)** | **CLAKI (mL/min)** | **SC** | **Danuria (mg/day)** | **CLNR (mL/min)** | **References** |
| acyclovir | 800 | 28.00 | 317.00 | 525 | 31.27 | 0.60 | 400 | 78.86 | (19-27) |
| amikacin | 1050 | 2.17 | 100.00 | 525 | * | 0.93 | 350 | 6.00 | (30-33) |
| amoxicillin | 1500 | 40.00 | 220.25 | 500 | * | 0.80 | 500 | 50.75 | (37-40) |
| amphotericin B | 350 | 13.00 | 141.00 | 350 | 92.1 | 0.05 | 350 | 121.10 | (41-45) |
| ampicillin | 8000 | 30.50 | 237.94 | 8000 | * | 0.72 | 2000 | 50.20 | (39,40,46-48) |
| aztreonam | 6000 | 31.21 | 102.81 | 2000 | * | 0.70 | 2000 | 37.50 | (27,52-57) |
| cefazolin | 3000 | 5.10 | 66.60 | 4000 | * | 0.26 | 500 | 2.60 | (65-67) |
| cefepime | 6000 | 8.90 | 120.00 | 4000 | 23 | 0.80 | 500 | 10.00 | (68-70) |
| cefotaxime | 5000 | 61.80 | 280.90 | 2000 | * | 0.68 | 1500 | 110.50 | (71-73) |
| cefotetan | 3000 | 8.00 | 30.00 | 2000 | * | 0.12 | 1000 | 4.20 | (74-76) |
| cefoxitin | 5000 | 6.20 | 279.00 | 6000 | * | 0.42 | 1000 | 58.00 | (77-79) |
| ceftaroline fosamil | 1200 | * | 160.00 | 800 | * | 0.80 | 400 | 41.10 | (80-82) |
| ceftazidime | 4000 | 6.80 | 115.00 | 4000 | 28.4 | 0.81 | 250 | 15.00 | (83-85) |
| ceftriaxone | 1500 | 12.30 | 37.70 | 2000 | 22.7 | 0.11 | 1500 | 23.80 | (86-88) |
| cefuroxime sodium | 4500 | 8.24 | 125.00 | 2000 | 6.1 | 0.90 | 750 | 13.70 | (89-91) |
| ciprofloxacin | 1200 | 151.67 | 583.33 | 400 | * | 0.67 | 400 | 216.67 | (92-96) |
| clindamycin | 2250 | * | 315.00 | 1800 | * | 0.23 | 2250 | 263.03 | (97-99) |
| daptomycin | 500 | 3.40 | 11.54 | 280 | 5 | 0.16 | 210 | 3.87 | (108-113) |
| doripenem | 1500 | 28.70 | 253.89 | 750 | 44.5 | 0.67 | 500 | 85.17 | (118-123) |
| ertapenem | 1000 | * | 30.00 | 1000 | 19.3 | 0.21 | 500 | 16.10 | (128-131) |
| fluconazole | 400 | * | 18.80 | 400 | 7.8 | 0.89 | 100 | 5.60 | (138-140) |
| foscavir | 6300 | 17.50 | 148.05 | 2100 | * | 0.85 | * | 11.93 | (141-147) |
| ganciclovir | 300 | 3.50 | 246.40 | 87.5 | 10.1 | 0.85 | 18.75 | 44.12 | (148-152) |
| gentamicin | 270 | 6.03 | 72.00 | 120 | 9.16 | 0.83 | 30 | 6.00 | (153-158) |
| imipenem | 2750 | 52.50 | 371.45 | 2000 | 91.95 | 1.20 | 500 | 128.10 | (162-167) |
| levofloxacin | 750 | 37.00 | 158.00 | 250 | 51.16 | 0.64 | 250 | 59.00 | (172-178) |
| linezolid | 1200 | 76.60 | 118.00 | 1200 | 61.6 | 0.67 | 1200 | 67.17 | (184-189) |
| meropenem | 3000 | 25.40 | 255.00 | 3000 | 82.387 | 0.88 | 1500 | 61.70 | (193-198) |
| moxifloxacin | 400 | 151.67 | 200.00 | 400 | 256.67 | 0.82 | 400 | 156.60 | (172,217-220) |
| nafcillin | 6000 | * | 628.00 | 6000 | * | 0.10 | 9000 | 439.60 | (221,222) |
| oseltamivir | 150 | * | 341.10 | 150 | 33.3 | 0.58 | 30 | 0.00 | (223-228) |
| piperacillin | 16000 | 47.83 | 183.33 | 12000 | 44.025 | 0.70 | 8000 | 58.67 | (240-244) |
| rifampin | 600 | * | 198.00 | 600 | * | 0.20 | 600 | 138.00 | (256) |
| sulbactam | 4000 | 45.30 | 231.08 | 1000 | * | 0.62 | 1000 | 48.11 | (46-48) |
| tazobactam | 2000 | * | 155.90 | 1500 | 26.6 | 0.70 | 1000 | 31.18 | (240,242,244,265,266) |
| telavancin | 700 | 8.17 | 14.58 | 500 | * | 0.28 | 350 | 4.67 | (267-272) |
| tigecycline | 100 | 275.34 | 344.17 | 100 | * | 0.20 | 100 | 288.08 | (273-276) |
| tobramycin | 270 | 3.50 | 70.00 | 120 | 14.5 | 1.00 | 122.5 | 0.00 | (155,277-279) |
| trimethoprim | 1050 | * | 100.00 | 700 | * | 0.56 | 350 | 36.00 | (282) |
| vancomycin | 2000 | 6.07 | 67.67 | 1000 | 26.3 | 0.45 | 125 | 11.67 | (283-287) |
